# Supplementary material for: A novel high-throughput screen for identifying lipids that stabilise membrane proteins in detergent based solution
Source: PubMed Central journal article supplement (PMC8274869; doi:10.1371/journal.pone.0254118), 2021-07-12
Supplement: pone.0254118.s005.pdf [file pone.0254118.s005.pdf]

A<sub>2A</sub>R purification gel image: used to generate left panel in Figure S1 (also shown below).

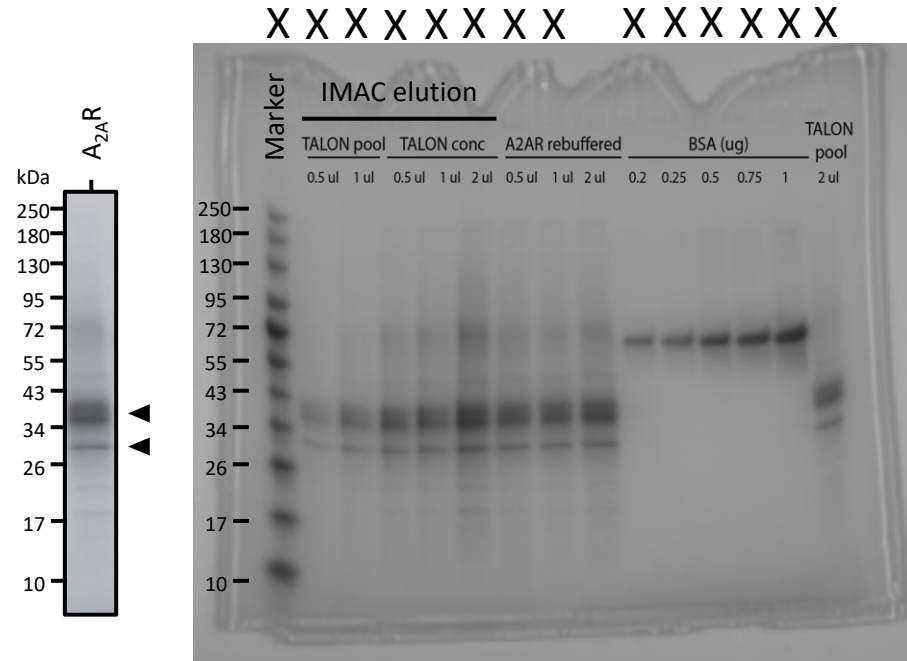

Coomassie-blue stained SDS-PAGE gel

UapA purification gel image: used to generate middle panel in Figure S1 (also shown below).

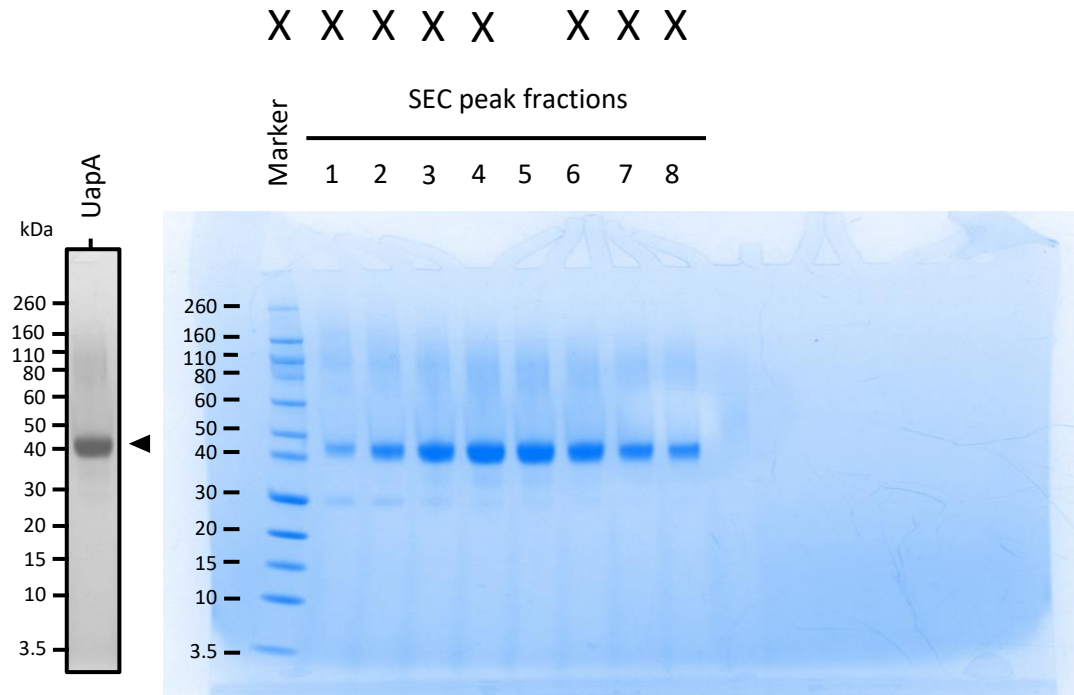

Coomassie-blue stained SDS-PAGE gel

*Tm*-PPase purification gel image: used to generate right panel in Figure S1 (also shown below).

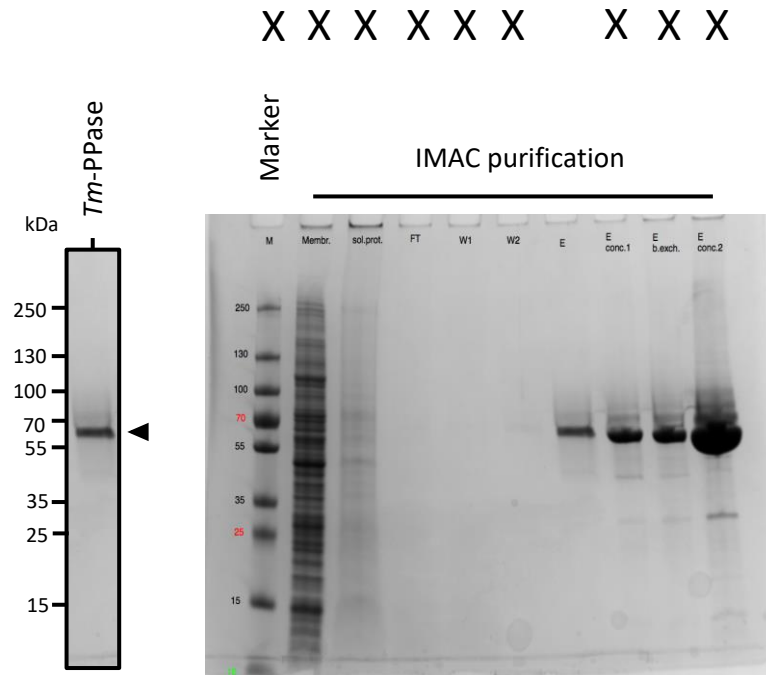

Coomassie-blue stained SDS-PAGE gel
